# Supplementary material
Source: PubMed Central journal article supplement (PMC7166419)
Supplement: JLB-103-1225-s001.pdf [file JLB-103-1225-s001.pdf]

# Supplemental Figure 1

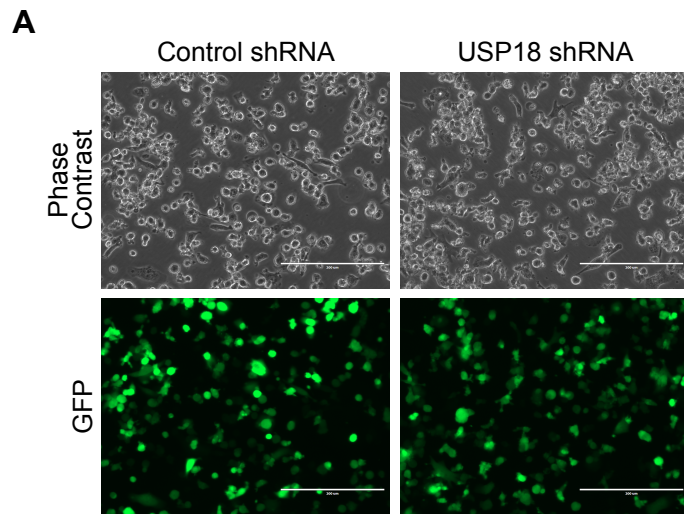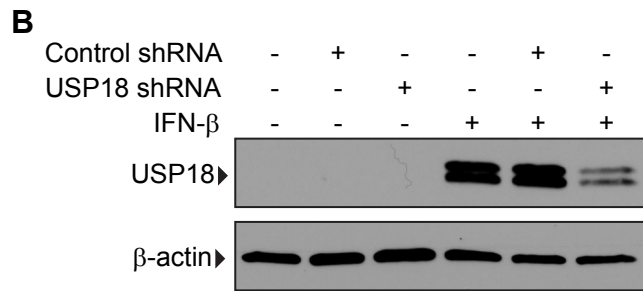

**Supplemental Figure 1. USP18 knockdown by shRNA in THP-1 cells.** THP-1 cells were transduced with GIPZ lentiviral vectors that express shRNA and GFP from the same transcript. **(A)** After PMA activation, the CMV promoter becomes very active and GFP is readily detectable by epifluorescence microscopy. **(B)** USP18 expression was measured by Western blot to confirm successful knockdown by shRNA.

# Supplemental Figure 2

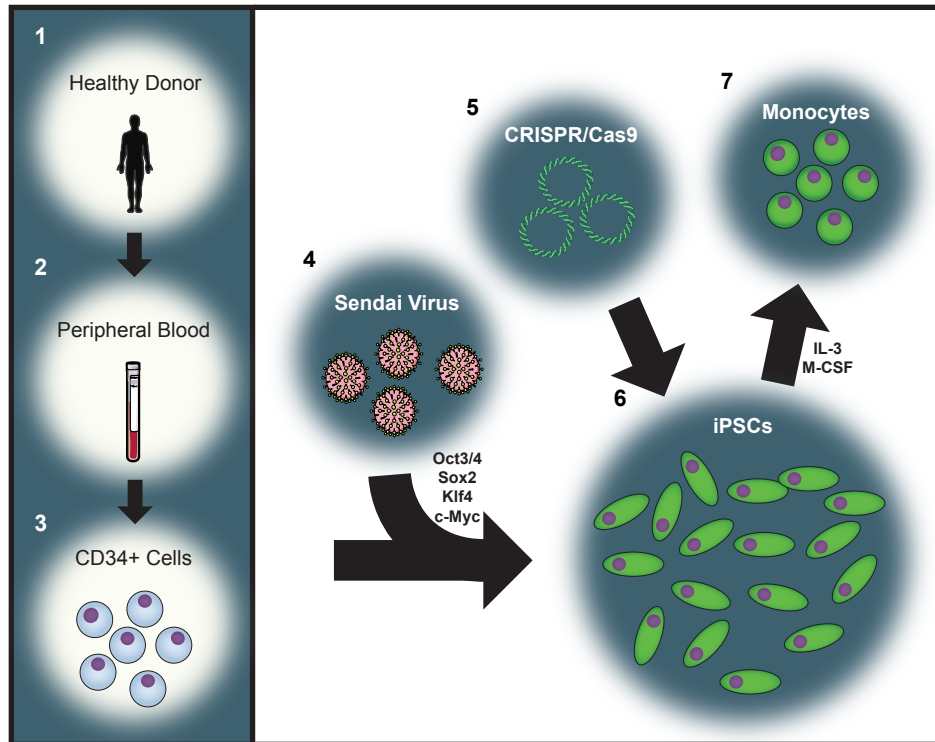

**Supplemental Figure 2. Workflow for generating iPSC-derived monocytes.** CD34<sup>+</sup> cells are isolated from the peripheral blood of healthy human donors (1-3). The CD34<sup>+</sup> cells are expanded in vitro and transduced with a Sendai virus that delivers Oct3/4, Sox2, Klf4, and c-Myc (4). These factors induce the CD34<sup>+</sup> cells to become pluripotent stem cells (6). These cells can now be modified by CRISPR/Cas9 gene editing or the colonies are scraped from the plate and form embryoid bodies. The embryoid bodies are cultured in the presence of IL-3 and M-CSF and will begin to produce CD14<sup>+</sup> monocytes (7). The monocytes are then cultured in M-CSF alone and will differentiate into macrophages. Some images were adapted from Servier Medical Art under a creative commons attribution 3.0 unported license.



# Supplemental Figure 3

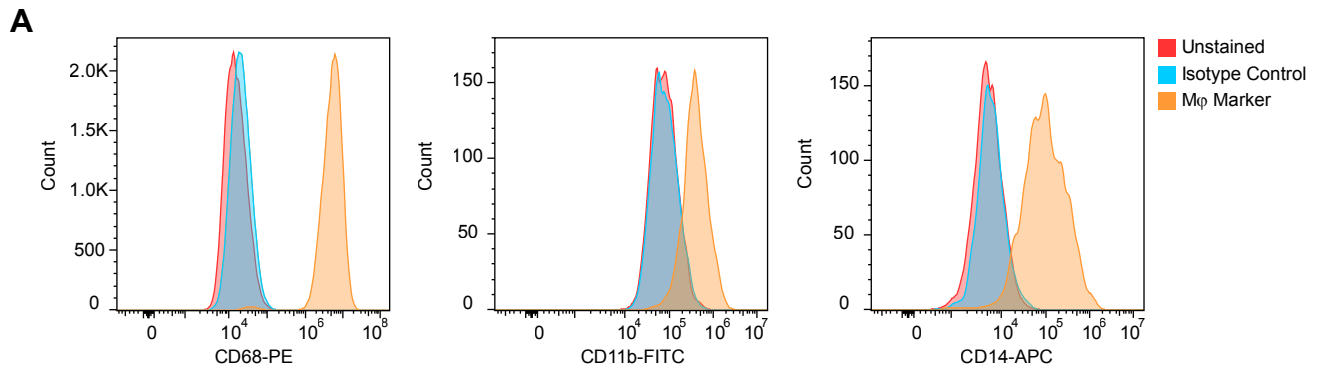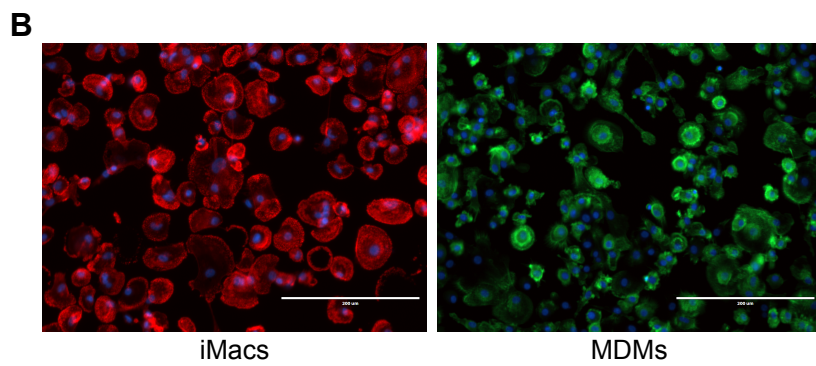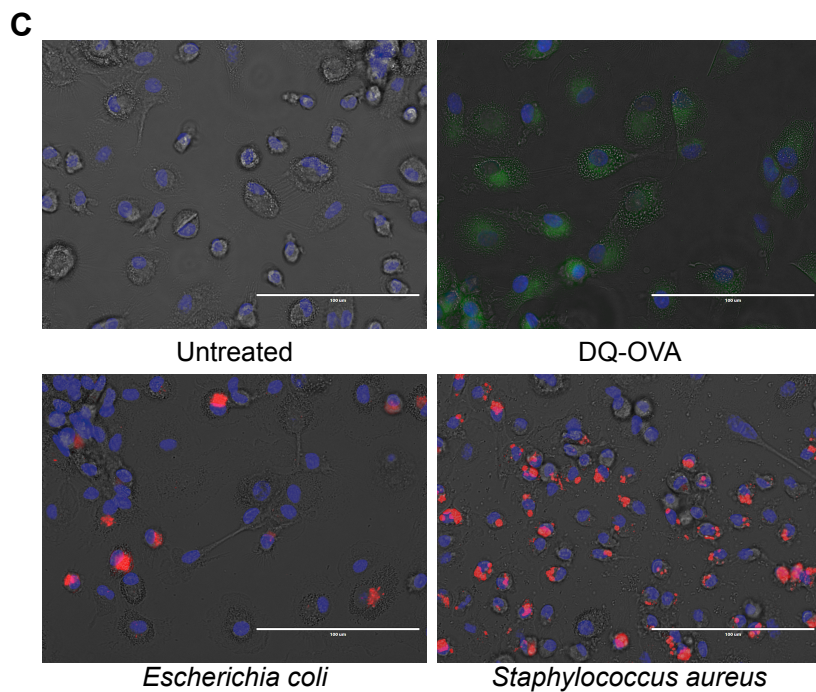

**Supplemental Figure 3. Characterization of iMacs.** **(A)** iMacs are CD14<sup>+</sup>, CD11b<sup>+</sup> and CD68<sup>+</sup> as measured by flow cytometry. **(B)** The nuclei (Blue) and actin (red or green) of iMacs and MDMs were stained showing similar morphology. **(C)** iMacs fed DQ-OVA were able to take up the protein and digest the protein with acidic proteases as indicated by GFP fluorescence (top right panel). iMacs were also fed heat-killed pHrodo red-labelled *Escherichia coli* and *Staphylococcus aureus*. The pH sensitive dye fluoresces red when the phagosome acidifies (bottom panels).
